# Supplementary material
Source: PubMed Central journal article supplement (PMC5916008)
Supplement: ba017517-suppl1.pdf [file ba017517-suppl1.pdf]

**Table S1. Immunophenotyping of primary samples from healthy donors and AML patients**

| <b>Cell Subpopulation</b> | <b>Identifying Markers</b>                                                                           |
|---------------------------|------------------------------------------------------------------------------------------------------|
| HSC                       | CD34 <sup>+</sup> , CD38 <sup>-</sup> , CD90 <sup>+</sup> , CD45RA <sup>-</sup>                      |
| MPP                       | CD34 <sup>+</sup> , CD38 <sup>-</sup> , CD90 <sup>-</sup> , CD45RA <sup>-</sup>                      |
| CLP                       | CD34 <sup>+</sup> , CD10 <sup>+</sup>                                                                |
| CMP                       | CD34 <sup>+</sup> , CD38 <sup>+</sup> , CD10 <sup>-</sup> , CD135 <sup>+</sup> , CD45RA <sup>-</sup> |
| GMP                       | CD34 <sup>+</sup> , CD38 <sup>+</sup> , CD10 <sup>-</sup> , CD135 <sup>+</sup> , CD45RA <sup>+</sup> |
| MEP                       | CD34 <sup>+</sup> , CD38 <sup>+</sup> , CD10 <sup>-</sup> , CD135 <sup>-</sup> , CD45RA <sup>-</sup> |
| AML blast                 | SSC low-med, CD45 med                                                                                |
| AML progenitors           | SSC low-med, CD45 med, CD34 <sup>+</sup> , CD38 <sup>+</sup>                                         |
| AML LSC                   | SSC low-med, CD45 med, CD34 <sup>+</sup> , CD38 <sup>-</sup>                                         |

HSC, hematopoietic stem cells; MPP, multipotent progenitors; CLP, common lymphoid progenitors; CMP, common myeloid progenitors; GMP, granulocyte/macrophage progenitors; MEP, megakaryocyte erythroid progenitors; LSC, leukemic stem cells

**Table S2. Binding affinities of anti-CD123 antibodies to HNT-34 cells, measured by flow cytometry.**

| <b>Antibody</b> | <b>Kd, pM</b> |
|-----------------|---------------|
| 7G3             | 3,000         |
| 9F5             | 1,000         |
| 6H6             | 2,000         |
| CD123-6         | 80            |

**Table S3. Binding affinities of G4723A, IMGN632, and X-ADC to HNT-34 cells, measured by flow cytometry**

| <b>Compound</b> | <b>Kd, pM</b> |
|-----------------|---------------|
| G4723A          | 52            |
| IMGN632         | 38            |
| X-ADC           | 40            |

**Table S4. Binding kinetics of G4723A and IMGN632, measured by ForteBio**

| <b>Compound</b> | <b>K<sub>on</sub>, (1/Ms)</b> | <b>K<sub>off</sub> (1/s)</b> | <b>Kd, M</b> |
|-----------------|-------------------------------|------------------------------|--------------|
| G4723A          | 2.00E+06                      | 8.00E-05                     | 6.00E-11     |
| IMGN632         | 1.00E+06                      | 9.00E-05                     | 9.00E-11     |

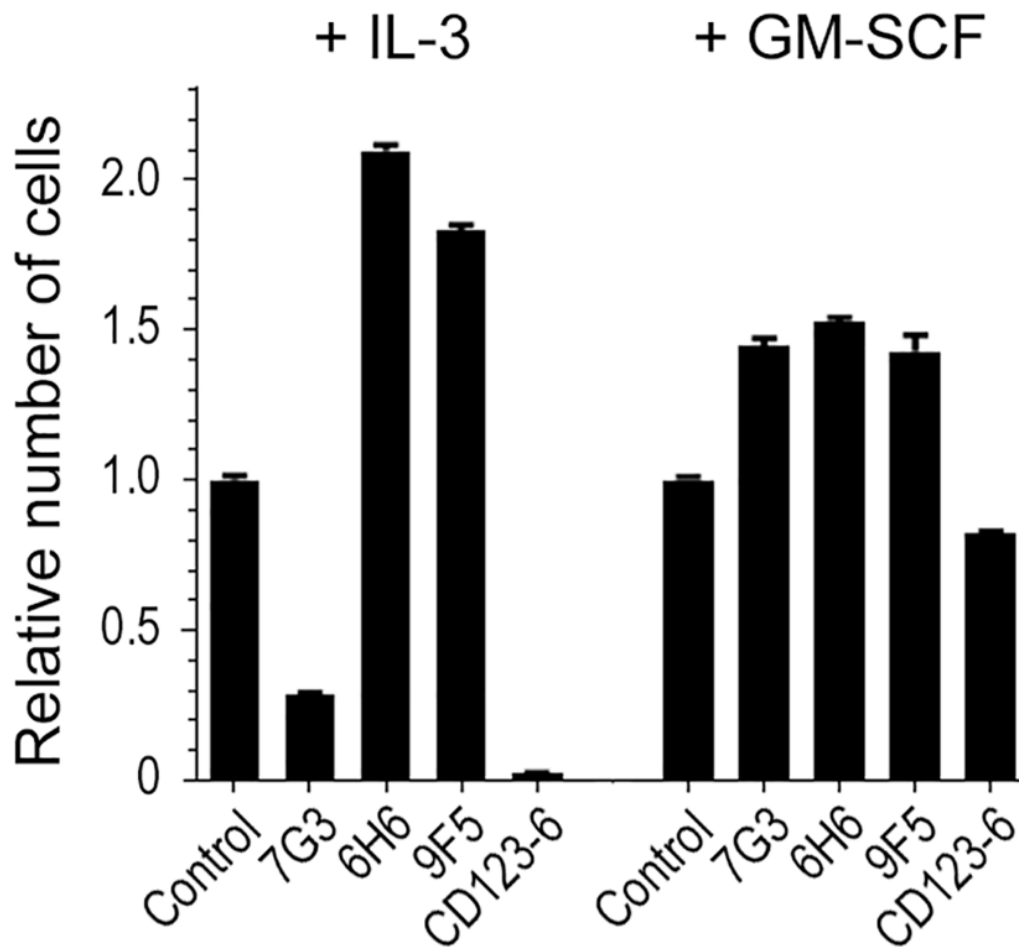

**Figure S1.** Effect of anti-CD123 antibodies on growth factor-mediated TF-1 cell proliferation. TF-1 cells were starved of IL-3 and GM-CSF overnight, then plated at 6,000 cells per well in either the presence or absence of 10  $\mu\text{g}/\text{mL}$  of an anti-CD123 antibody, followed by addition of either IL-3 (1  $\text{ng}/\text{mL}$ ) or GM-CSF (2  $\text{ng}/\text{mL}$ ). Cells were incubated at 37°C for 3 days. The relative numbers of viable cells in each well were determined by WST-8 assay.

## IMGN632

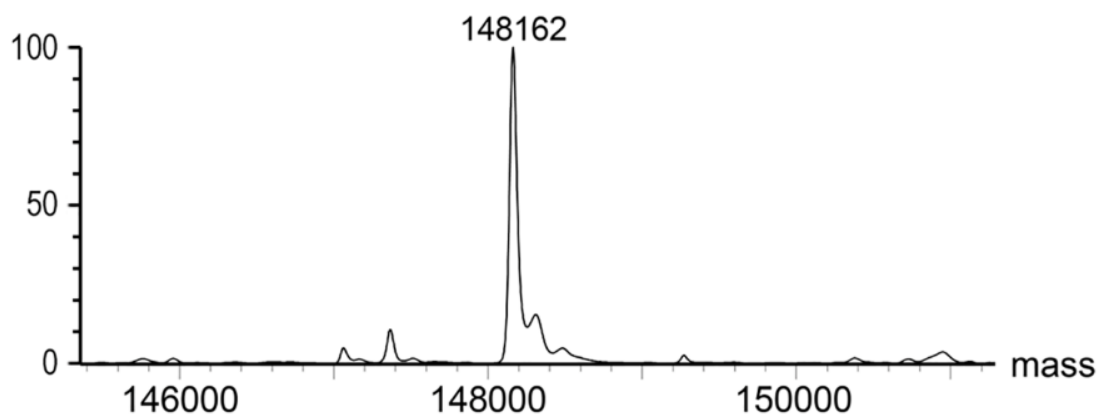

## X-ADC

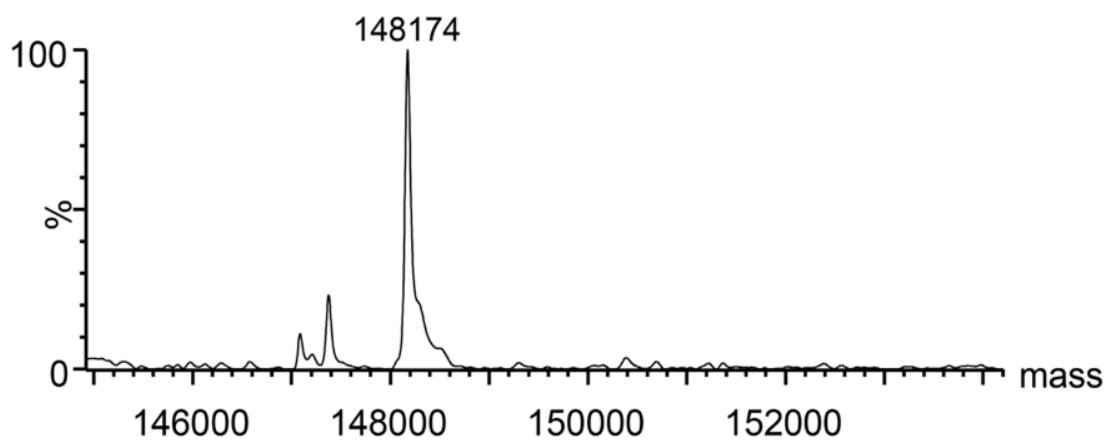

**Figure S2.** Homogeneity of drug loading on IMGN632 and X-ADC. ADCs were evaluated by mass spectrophotometric analysis. The major peak represents G4723A antibody conjugated with 2 payload molecules.

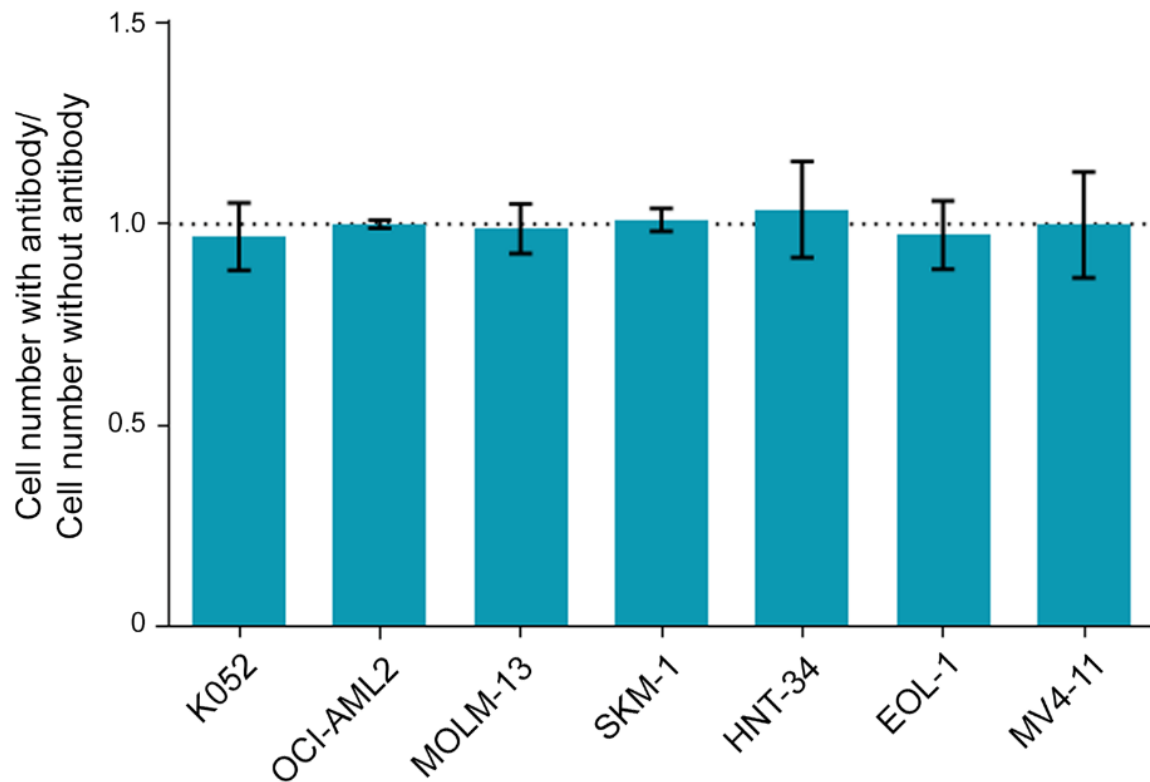

**Figure S3.** Effect of G4723A on proliferation of AML cell lines. Cells were incubated with 1  $\mu$ M of an antibody that is identical to G4723A, but lacking engineered cysteines. Four to seven days later, cell viability was determined using WST-8 assays and compared to that of the cells grown in the absence of the antibody.

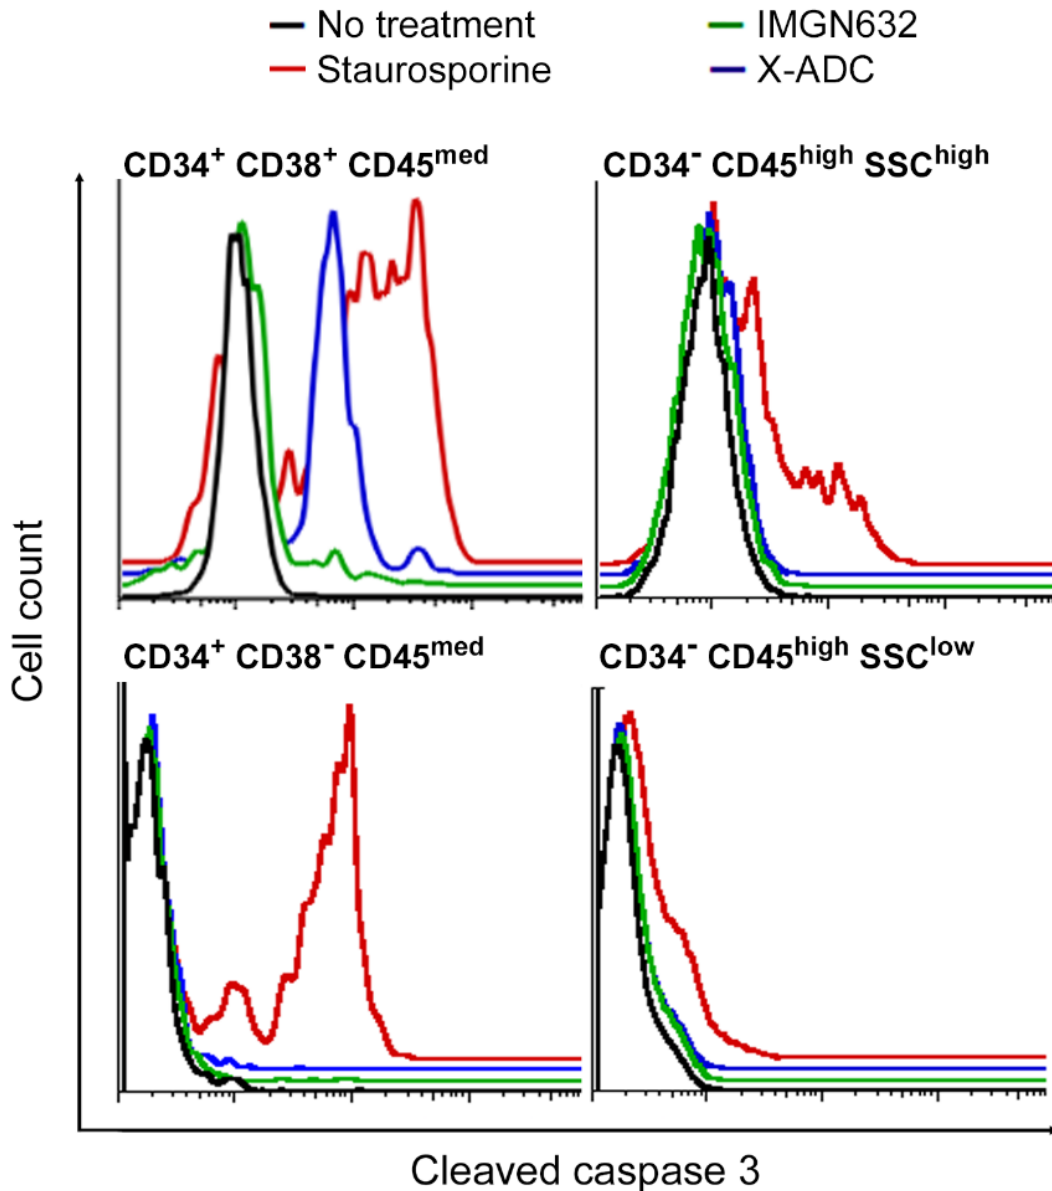

**Figure S4.** X-ADC, but not IMGN632, induces apoptosis of CD34<sup>+</sup>CD38<sup>+</sup> bone marrow cells. Bone marrow mononuclear cells from a healthy volunteer were treated with 5  $\mu$ M of staurosporine for 4 hours or 100 pM of either IMGN632 or X-ADC for 72 hours at 37°C. Cells were harvested and stained for markers of cell lineage (CD45, CD34, CD38) and apoptosis (cleaved caspase-3) using multiparametric flow cytometry and analyzed with ModFit or FlowJo software.

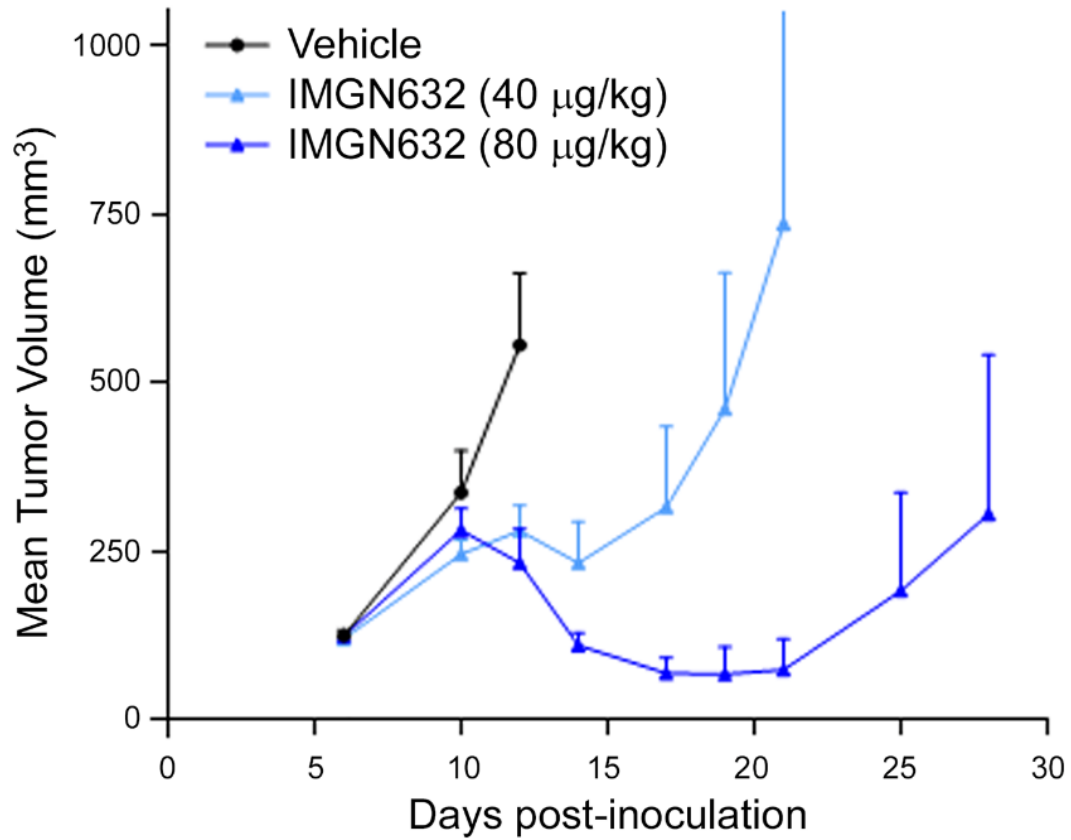

**Figure S5.** Low, single dose IMGN632 is active in EOL-1 subcutaneous xenograft AML model. Nude mice bearing EOL-1 xenografts received a single dose of vehicle or IMGN632 (40 µg/kg or 80 µg/kg), as indicated.
